# Supplementary material for: Particulate matter induces airway epithelial barrier dysfunction in vivo and in vitro: from a more realistic inhalation scenario
Source: Royal Society of Chemistry journal article supplement (doi:10.1039/d2en00390b), 2022-01-01
Supplement: d2en00390b1.pdf [file d2en00390b1.pdf]

## *Supporting Information*

### Particulate matter induces airway epithelial barrier dysfunction *in vivo* and *in vitro*: from a more realistic inhalation scenario

Shuting Wei, Huifeng Yue, Guangke Li, Nan Sang\*

*College of Environment and Resource, Research Center of Environment and Health,  
Shanxi University, Taiyuan, Shanxi 030006, PR China*

\* Corresponding author. Tel.: +86-351-7018696

Fax: +86-351-7018696

E-mail: sangnan@sxu.edu.cn

Mailing address: Nan Sang

College of Environment and Resource,

Shanxi University, Taiyuan, Shanxi 030006

People's Republic of China

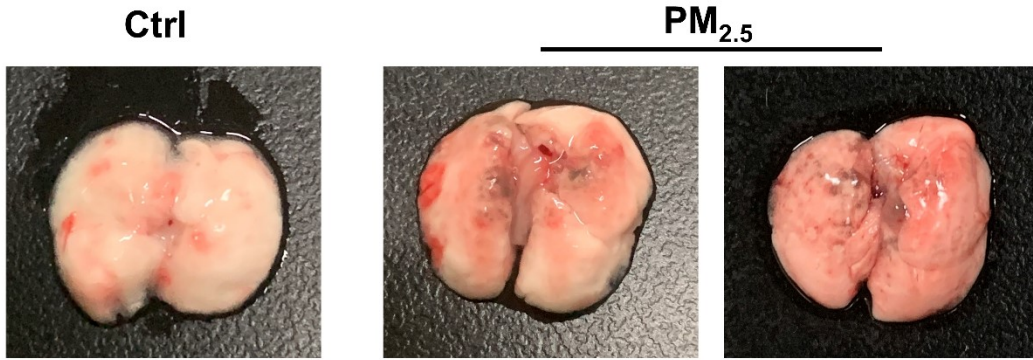

**Figure S1. Representative pictures of lung tissues in C57BL/6 mice exposed to PM<sub>2.5</sub> (3 mg/kg b.w.) every other day for 4 weeks.**

**Table S1. The primers for PCR reactions in the current study.**

| Genes            | Species | Forward (5'-3')         | Reverse (5'-3')         |
|------------------|---------|-------------------------|-------------------------|
| ZO-1             | human   | AGCCATTCCCGAAGGAGTTG    | GCAAAAGACCAACCGTCAGG    |
| Occludin         | human   | TGCGGCGAGCGGATTG        | TGGACTTTCAAGAGGCCTGG    |
| claudin-2        | human   | TATGTCGGTGCCAGCATTGT    | GCTACCGCCACTCTGTCTTT    |
| E-cadherin       | human   | AATGCCGCCATCGCTTAC      | AGGCACCTGACCCTTGTA      |
| $\beta$ -catenin | human   | ATGACTCGAGCTCAGAGGGT    | ATTGCACGTGTGGCAAGTTC    |
| Muc5ac           | mouse   | CTGTGACATTATCCCATAAGCCC | AAGGGGTATAGCTGGCCTGA    |
| Muc5b            | mouse   | GTGGCCTTGCTCATGGTGT     | GGACGAAGGTGACATGCCT     |
| $\beta$ -actin   | human   | CTGGAACGGTGAAGGTGACA    | AAGGGACTTCCTGTAACAATGCA |
| Gapdh            | mouse   | TGGTCCAGGGTTTCTTACTC    | GTTGTCTCCTGCGACTTCA     |
